# Supplementary material
Source: Oxford University Press journal article supplement (doi:10.1051/bsgf_2017206)

Strain patterns of the Paleozoic crust of the Pyrenees. (a) Structural and kinematic map. (b) Synthetic structural map.

Cochelin B, Chardon D, Denèle Y, Gumiaux C, Le Bayon B. 2017. Bull. Soc. géol. Fr., vol: 188, article number 38.

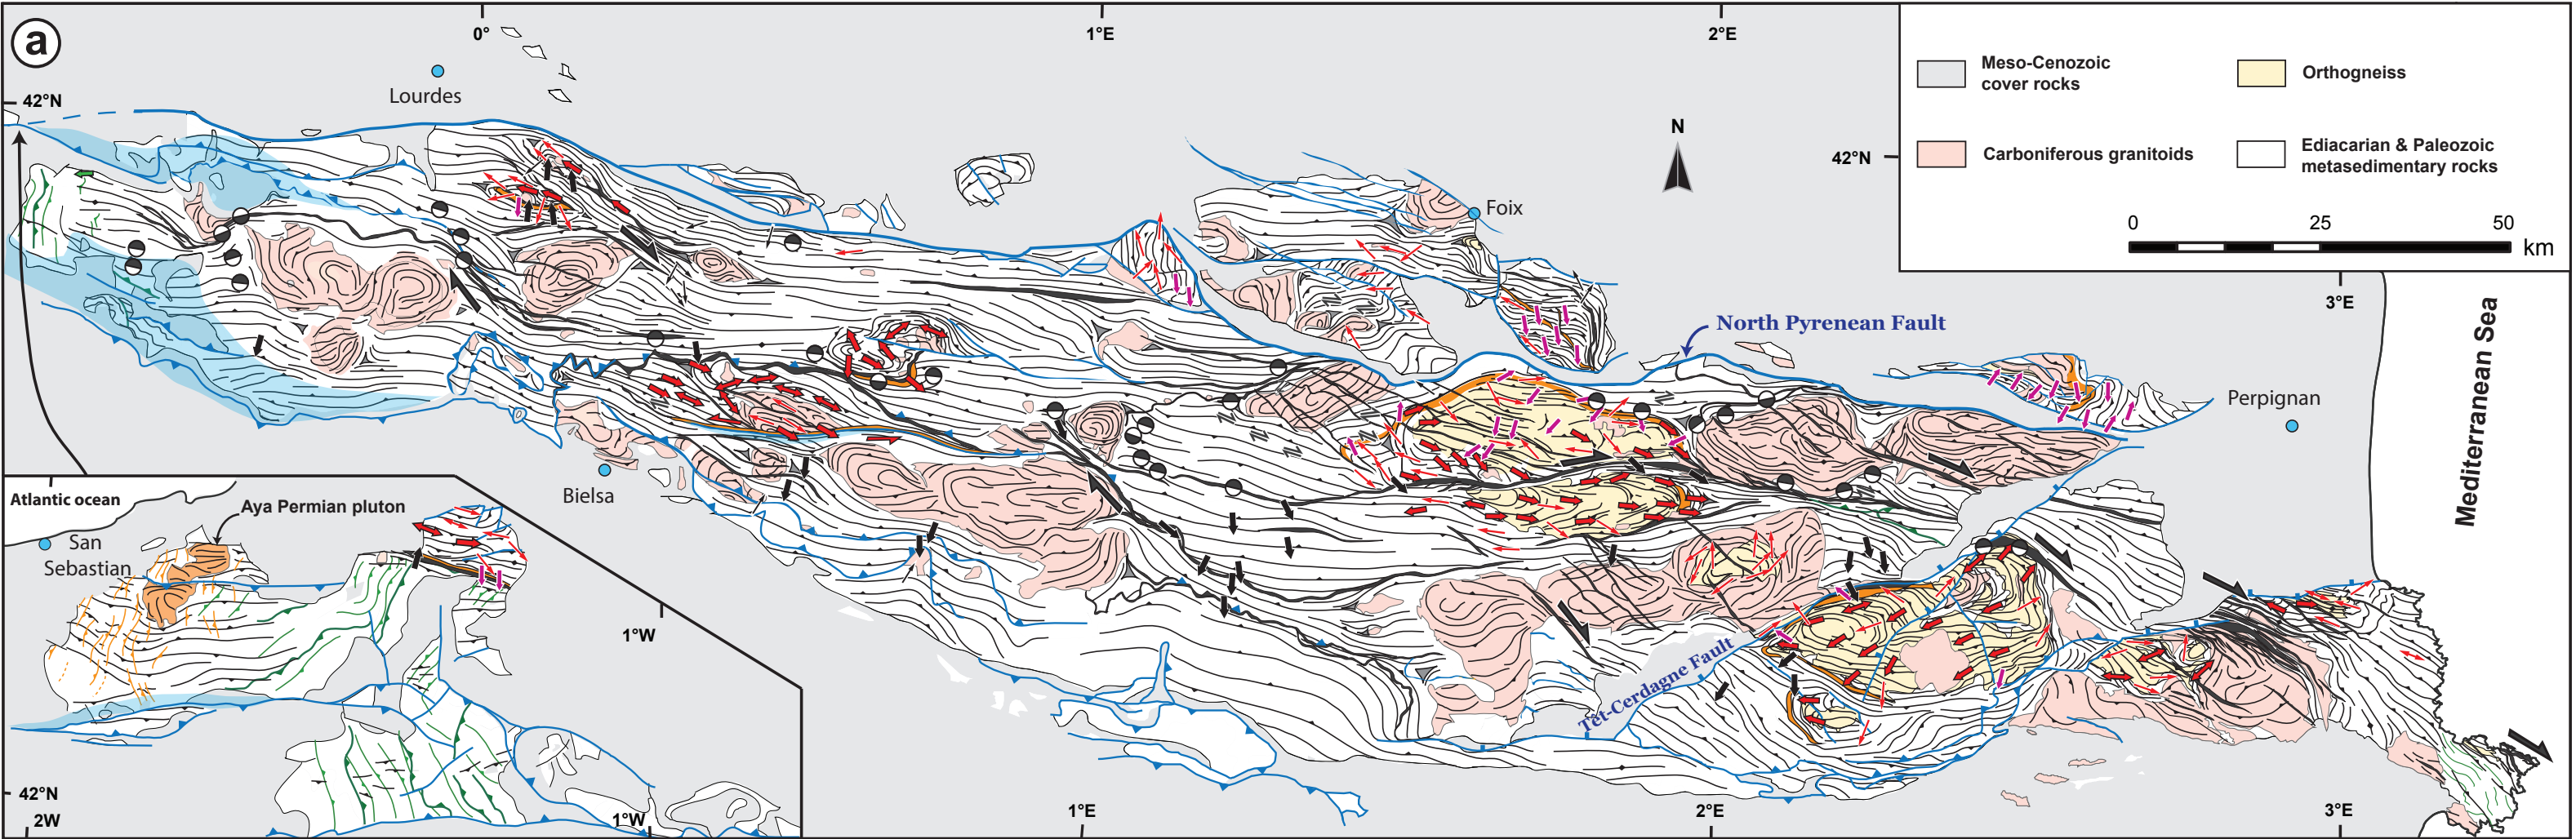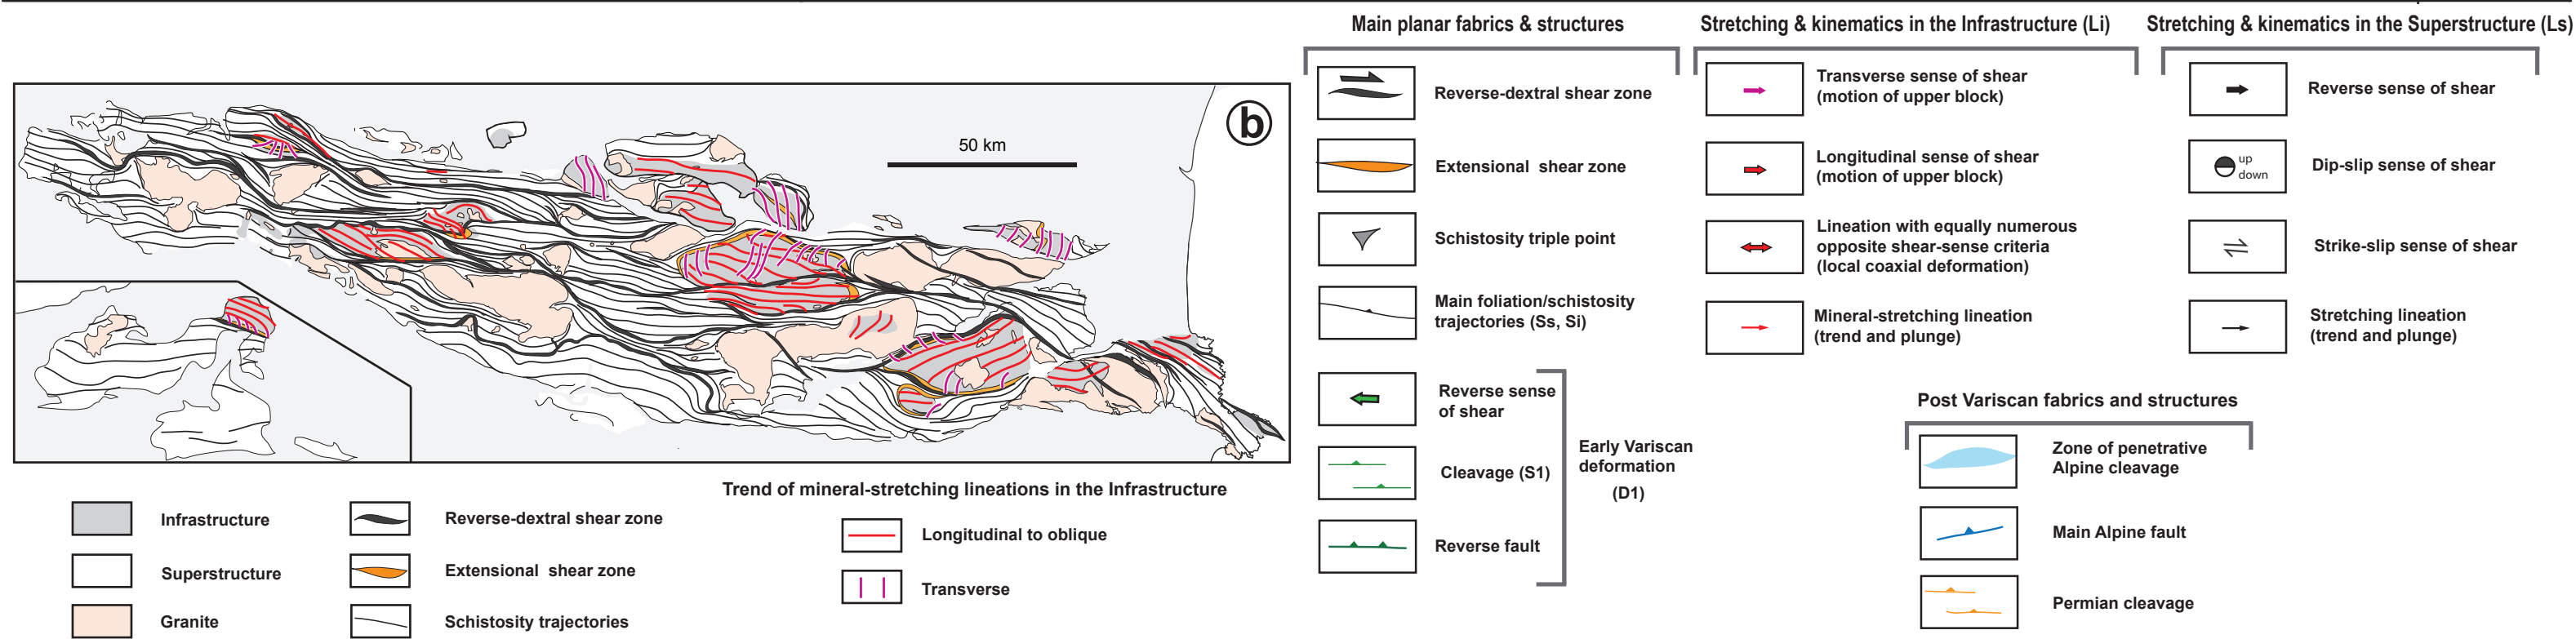

Supplement: bsgf_2017_188_6_170012-1-olm.zip [file bsgf_2017_188_6_170012-1-olm.zip]
